# Supplementary material
Source: PubMed Central journal article supplement (PMC9034805)
Supplement: 7806_2_supp_99315_r3rdjq.pdf [file 7806_2_supp_99315_r3rdjq.pdf]

## Supplemental Material Table of Contents

|                       |                                                                                                                                                                |
|-----------------------|----------------------------------------------------------------------------------------------------------------------------------------------------------------|
| Supplemental Text 1   | ASPREE Study design and population                                                                                                                             |
| Supplemental Text 2   | Incident Dementia Outcome and Dementia Assessment                                                                                                              |
| Supplemental Table 1  | Sample sizes for those who had cognitive assessments at each Annual Visit (AV)                                                                                 |
| Supplemental Table 2  | Summary of cognitive tests at baseline and Annual Visits (AV)                                                                                                  |
| Supplemental Table 3  | Association between renal function and cognitive function at baseline: parameter estimates for the interaction terms between eGFR and UACR                     |
| Supplemental Table 4  | Association between baseline renal function and change in cognitive function: parameter estimates for the interaction terms between eGFR and UACR and time     |
| Supplemental Table 5  | Association between baseline renal functions and CIND and dementia: parameter estimates for the interaction terms between eGFR and UACR                        |
| Supplemental Figure 1 | Consolidated Standards of Reporting Trials (CONSORT) flow diagram of participants in the Aspirin in Reducing Events in the Elderly (ASPREE) trial <sup>1</sup> |

**Supplemental Table 1.** Sample sizes for those who had cognitive assessments at each Annual Visit (AV)

| <b>Test</b> | <b>Baseline</b> | <b>AV1</b> | <b>AV2</b> | <b>AV3</b> | <b>AV4</b> | <b>AV5</b> | <b>AV6</b> |
|-------------|-----------------|------------|------------|------------|------------|------------|------------|
| 3MS         | 19114           | 17869      | 27         | 14729      | 1728       | 6984       | 1654       |
| COWAT       | 19083           | 17807      | 17         | 14614      | 1718       | 6924       | 1640       |
| HVLT4       | 19007           | 17663      | 20         | 14364      | 1692       | 6738       | 1603       |
| SDMT        | 19030           | 17701      | 17         | 14456      | 1704       | 6787       | 1616       |

**Supplemental Table 2.** Summary of cognitive tests at baseline and Annual Visits (AV)

| <b>Characteristic</b> | <b>3MS</b>  | <b>COWAT</b> | <b>HVLT4</b> | <b>SDMT</b> |
|-----------------------|-------------|--------------|--------------|-------------|
| <b>Baseline</b>       |             |              |              |             |
| N                     | 19,114      | 19,083       | 19,007       | 19,030      |
| Mean (SD)             | 93.4 (4.6)  | 12.1 (4.6)   | 7.7 (2.8)    | 36.7 (10.1) |
| Median (IQR)          | 94 (91, 97) | 12 (9, 15)   | 8 (6, 10)    | 37 (30, 44) |
| Range                 | 75, 100     | 0, 36        | 0, 12        | 1, 99       |
| <b>Annual visit 1</b> |             |              |              |             |
| N                     | 17,869      | 17,807       | 17,663       | 17,701      |
| Mean (SD)             | 94.2 (4.7)  | 13.2 (4.8)   | 8.2 (3.0)    | 36.9 (10.1) |
| Median (IQR)          | 95 (92, 98) | 13 (10, 16)  | 9 (6, 11)    | 37 (30, 44) |
| Range                 | 56, 100     | 0, 46        | 0, 12        | 0, 84       |
| <b>Annual visit 2</b> |             |              |              |             |
| N                     | 27          | 17           | 20           | 17          |
| Mean (SD)             | 84.2 (9.0)  | 10.7 (4.9)   | 5.0 (3.5)    | 27.6 (11.9) |
| Median (IQR)          | 81 (78, 92) | 10 (6, 14)   | 5 (2, 8)     | 23 (19, 35) |
| Range                 | 67, 100     | 5, 20        | 0, 11        | 12, 50      |
| <b>Annual visit 3</b> |             |              |              |             |
| N                     | 14,729      | 14,614       | 14,364       | 14,456      |
| Mean (SD)             | 93.9 (5.4)  | 13.3 (5.0)   | 8.2 (3.2)    | 35.9 (10.1) |
| Median (IQR)          | 95 (92, 98) | 13 (10, 16)  | 9 (6, 11)    | 36 (29, 43) |
| Range                 | 30, 100     | 0, 45        | 0, 12        | 0, 80       |
| <b>Annual visit 4</b> |             |              |              |             |
| N                     | 1,728       | 1,718        | 1,692        | 1,704       |
| Mean (SD)             | 93.9 (5.8)  | 13.4 (4.9)   | 8.2 (3.2)    | 35.7 (10.4) |
| Median (IQR)          | 95 (92, 98) | 13 (10, 16)  | 9 (6, 11)    | 36 (29, 43) |
| Range                 | 33, 100     | 1, 35        | 0, 12        | 1, 68       |
| <b>Annual visit 5</b> |             |              |              |             |
| N                     | 6,984       | 6,924        | 6,738        | 6,787       |
| Mean (SD)             | 93.5 (6.4)  | 13.6 (5.1)   | 8.2 (3.3)    | 35.0 (10.2) |
| Median (IQR)          | 95 (91, 98) | 13 (10, 17)  | 9 (6, 11)    | 35 (28, 42) |
| Range                 | 1, 100      | 0, 51        | 0, 12        | 1, 68       |
| <b>Annual visit 6</b> |             |              |              |             |
| N                     | 1,654       | 1,640        | 1,603        | 1,616       |
| Mean (SD)             | 94.0 (6.7)  | 14.0 (5.0)   | 8.5 (3.3)    | 35.8 (10.5) |
| Median (IQR)          | 96 (92, 98) | 14 (10, 17)  | 9 (6, 11)    | 36 (29, 43) |
| Range                 | 30, 100     | 1, 39        | 0, 12        | 1, 71       |

**Supplemental Table 3.** Association between renal function and cognitive function at baseline: parameter estimates for the interaction terms between eGFR and UACR

| <b>Characteristic</b> | <b>N</b> | <b>Beta</b> | <b>95% CI<sup>1</sup></b> | <b>p-value</b> |
|-----------------------|----------|-------------|---------------------------|----------------|
| <b>3MS</b>            | 17,753   |             |                           |                |
| eGFR < 45: UACR ≥3    |          | 0.32        | -0.50, 1.1                | 0.4            |
| eGFR < 60: UACR ≥3    |          | -0.33       | -0.79, 0.13               | 0.2            |
| <b>COWAT</b>          | 17,725   |             |                           |                |
| eGFR < 45: UACR ≥3    |          | 0.12        | -0.72, 1.0                | 0.8            |
| eGFR < 60: UACR ≥3    |          | -0.01       | -0.48, 0.45               | >0.9           |
| <b>SDMT</b>           | 17,679   |             |                           |                |
| eGFR < 45: UACR ≥3    |          | 0.64        | -1.1, 2.4                 | 0.5            |
| eGFR < 60: UACR ≥3    |          | -0.53       | -1.5, 0.45                | 0.3            |
| <b>HVLT4</b>          | 17,663   |             |                           |                |
| eGFR < 45: UACR ≥3    |          | 0.02        | -0.50, 0.53               | >0.9           |
| eGFR < 60: UACR ≥3    |          | 0.07        | -0.21, 0.36               | 0.6            |

<sup>1</sup>CI = Confidence Interval

All models were adjusted for Age, Gender, Education (<12 and ≥12 years), Diabetes, Treatment group, Hypertension, and Race (White/Australia, White/US, Black, Hispanic, and Other)

**Supplemental Table 4.** Association between baseline renal function and change in cognitive function: parameter estimates for the interaction terms between eGFR and UACR and time

| <b>Characteristic</b>               | <b>Beta</b> | <b>95% CI<sup>1</sup></b> | <b>p-value</b> |
|-------------------------------------|-------------|---------------------------|----------------|
| <b>3MS</b>                          |             |                           |                |
| eGFR < 45: UACR ≥3: time (+5 years) | 0.36        | -0.97, 1.68               | 0.6            |
| eGFR < 60: UACR ≥3: time (+5 years) | -0.18       | -0.92, 0.56               | 0.6            |
| <b>COWAT</b>                        |             |                           |                |
| eGFR < 45: UACR ≥3: time (+5 years) | 1.02        | 0.01, 2.03                | 0.049          |
| eGFR < 60: UACR ≥3: time (+5 years) | 0.01        | -0.56, 0.58               | >0.9           |
| <b>SDMT</b>                         |             |                           |                |
| eGFR < 45: UACR ≥3: time (+5 years) | 0.57        | -1.20, 2.33               | 0.5            |
| eGFR < 60: UACR ≥3: time (+5 years) | -0.28       | -1.27, 0.70               | 0.6            |
| <b>HVLT4</b>                        |             |                           |                |
| eGFR < 45: UACR ≥3: time (+5 years) | 0.28        | -0.35, 0.91               | 0.4            |
| eGFR < 60: UACR ≥3: time (+5 years) | -0.21       | -0.56, 0.15               | 0.3            |

<sup>1</sup>CI = Confidence Interval. All models were adjusted for Age, Gender, Education (<12 and ≥12 years), Diabetes, Treatment group, Hypertension, and Race (White/Australia, White/US, Black, Hispanic, and Other)

**Supplemental Table 5.** Association between baseline renal functions and CIND and dementia: parameter estimates for the interaction terms between eGFR and UACR

| <b>Characteristic</b> | <b>HR<sup>1</sup></b> | <b>95% CI<sup>1</sup></b> | <b>p-value</b> |
|-----------------------|-----------------------|---------------------------|----------------|
| <b>CIND</b>           |                       |                           |                |
| eGFR < 45: UACR ≥3    | 1.07                  | 0.69, 1.68                | 0.8            |
| eGFR < 60: UACR ≥3    | 1.04                  | 0.81, 1.33                | 0.8            |
| <b>Dementia</b>       |                       |                           |                |
| eGFR < 45: UACR ≥3    | 0.49                  | 0.14, 1.74                | 0.3            |
| eGFR < 60: UACR ≥3    | 1.00                  | 0.60, 1.64                | >0.9           |

<sup>1</sup>HR = Hazard Ratio, CI = Confidence Interval. All models were adjusted for Age, Gender, Education (<12 and ≥12 years), Diabetes, Treatment group, Hypertension, and Race (White/Australia, White/US, Black, Hispanic, and Other)

**Supplemental Figure 1.** Consolidated standards of reporting trials (CONSORT) flow diagram of participants in the Aspirin in Reducing Events in the Elderly (ASPREE) trial<sup>1</sup>

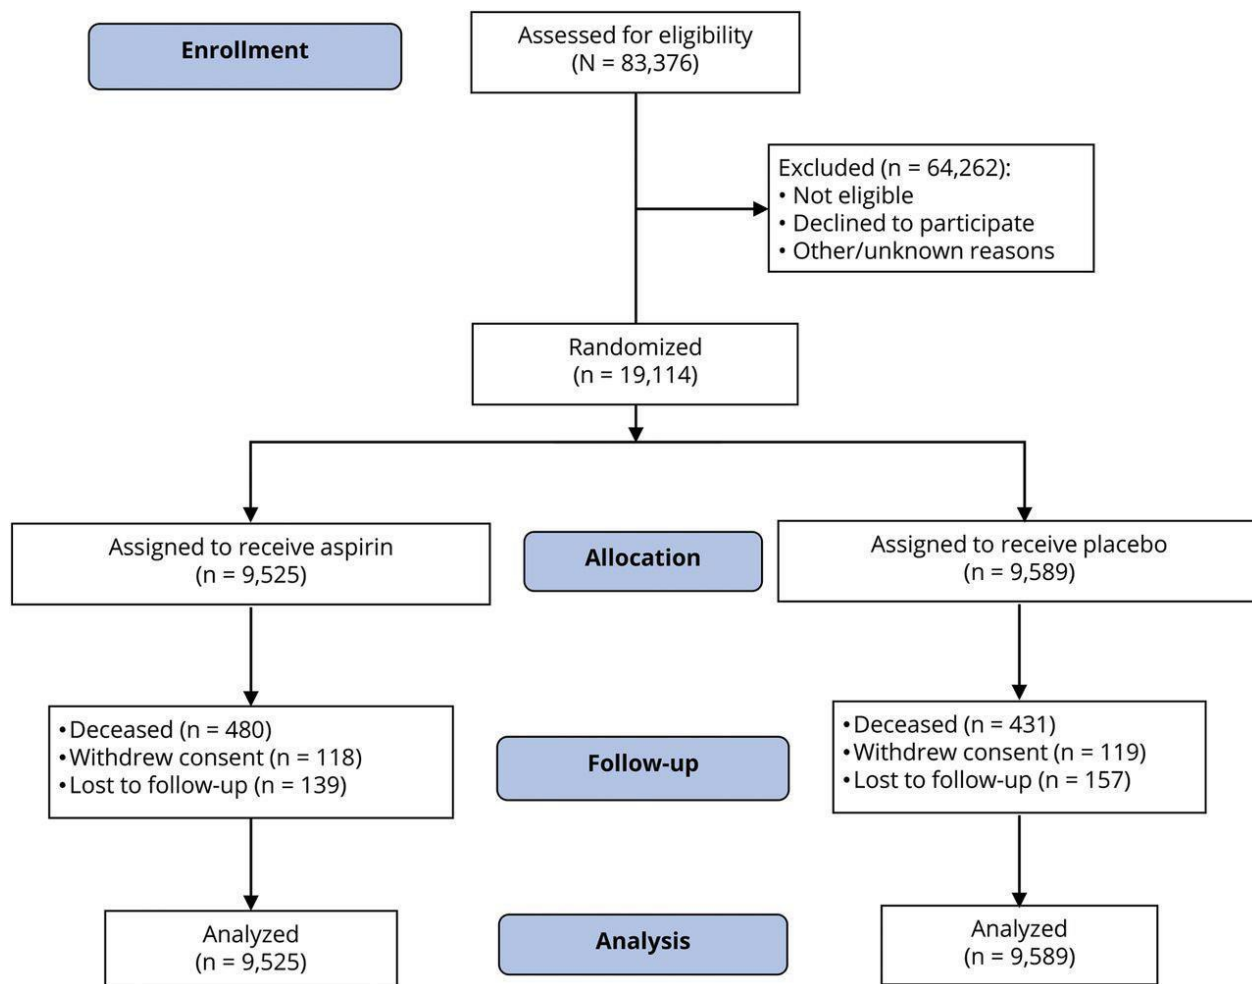

All randomized participants were included in the final analysis. For participants who withdrew from the trial or died, all information up to the point of withdrawal/death was included in the analysis.

<sup>1</sup>Ryan J, Storey E, Murray AM, et al. Randomized placebo-controlled trial of the effects of aspirin on dementia and cognitive decline. *Neurology*. 2020;95(3):e320-e331. doi:10.1212/WNL.00000000000009277
